# Supplementary material for: Long-term Air Pollution Exposure and Infertility in Reproductive-aged Women: A Nationwide Cohort Study in Taiwan
Source: Research Square preprint supplement (doi:10.21203/rs.3.rs-6260294/v1), 2025-04-17
Supplement: Supplementary file 1 [file 004fe8d3c5bbe3eada1a449e.docx]

**Supplementary**

Table S1-1. Characteristics of the study population among tertiles of SO2 exposure.

Table S1-2. Characteristics of the study population among tertiles of CO exposure.

Table S1-3. Characteristics of the study population among tertiles of O3 exposure.

Table S1-4. Characteristics of the study population among tertiles of PM10 exposure.

Table S1-5. Characteristics of the study population among tertiles of PM2.5 exposure.

Table S1-6. Characteristics of the study population among tertiles of NOX exposure.

Table S1-7. Characteristics of the study population among tertiles of NO exposure.

Table S1-8. Characteristics of the study population among tertiles of NO2 exposure.

Table S1-9. Characteristics of the study population among tertiles of THC exposure.

Table S1-10. Characteristics of the study population among tertiles of NMHC exposure.

Table S1-11. Characteristics of the study population among tertiles of CH4 exposure.

Table S2. Pearson’s correlation analysis for air pollutants over the exposure period

Table S3. Hazard ratios of long-term O3 exposure at a 1.73-ppb increment associated with the incidence of Infertility

**Table S1-1. Characteristics of the study population among tertiles of SO2 exposure**

| **Characteristic** | **Tertiles of average daily SO2, n (%)** | | | **P value** | **Total (N = 232125)** |
| --- | --- | --- | --- | --- | --- |
| **T1 (lowest) (n = 77141)** | **T2 (n = 75237)** | **T3 (highest) (n = 79747)** |
| **Infertility** | 974 (1.26) | 1799 (2.39) | 2208 (2.77) | <0.001 | 4981 (2.15) |
| **Age, years** |  |  |  | <0.001 |  |
| 15-35 | 40365 (52.33) | 38943 (51.76) | 42424 (53.20) |  | 121732 (52.44) |
| 36-60 | 36776 (47.67) | 36294 (48.24) | 37323 (46.80) |  | 110393 (47.56) |
| Mean ± SD | 35.42 ± 12.21 | 34.88 ± 12.84 | 34.94 ± 12.31 | <0.001 | 35.08 ± 12.45 |
| **Urbanization level** |  |  |  | <0.001 |  |
| 1 (highest) | 45942 (59.56) | 49038 (65.18) | 43901 (55.05) |  | 138881 (59.83) |
| 2 | 25735 (33.36) | 18781 (24.96) | 26640 (33.41) |  | 71156 (30.65) |
| 3 | 3405 (4.41) | 5073 (6.74) | 5802 (7.28) |  | 14280 (6.15) |
| 4 (lowest) | 119 (0.15) | 492 (0.65) | 1215 (1.52) |  | 1826 (0.79) |
| unknown | 1940 (2.51) | 1853 (2.46) | 2189 (2.74) |  | 5982 (2.58) |
| **Insurance amount, NT$** |  |  |  | <0.001 |  |
| financially dependent | 583 (0.76) | 272 (0.36) | 488 (0.61) |  | 1343 (0.58) |
| 1-19999 | 23577 (30.56) | 26236 (34.87) | 30055 (37.69) |  | 79868 (34.41) |
| 20000-39999 | 34093 (44.20) | 34021 (45.22) | 34761 (43.59) |  | 102875 (44.32) |
| ≥40000 | 16547 (21.45) | 12664 (16.83) | 11816 (14.82) |  | 41027 (17.67) |
| unknown | 2341 (3.03) | 2044 (2.72) | 2627 (3.29) |  | 7012 (3.02) |
| **CCI score** |  |  |  | <0.001 |  |
| Mean ± SD | 1.10 ± 1.66 | 1.12 ± 1.70 | 1.07 ± 1.68 |  | 1.10 ± 1.68 |
| **Comorbidity** |  |  |  |  |  |
| Inflammatory disease of the ovary, fallopian tube, pelvic cellular tissue, and peritoneum | 10808 (14.01) | 11130 (14.79) | 13988 (17.54) | <0.001 | 35926 (15.48) |
| Inflammatory disease of the uterus | 3826 (4.96) | 4293 (5.71) | 4122 (5.17) | <0.001 | 12241 (5.27) |
| Inflammatory disease of the cervix, vagina, and vulva | 35231 (45.67) | 35205 (46.79) | 37367 (46.86) | <0.001 | 107803 (46.44) |
| Endometriosis | 2952 (3.83) | 2775 (3.69) | 3101 (3.89) | 0.110 | 8828 (3.80) |
| Hypertension | 12944 (16.78) | 12605 (16.75) | 13216 (16.57) | 0.486 | 38765 (16.70) |
| Diabetes mellitus | 9055 (11.74) | 9075 (12.06) | 9195 (11.53) | 0.005 | 27325 (11.77) |
| Hypertriglyceridemia | 106 (0.14) | 79 (0.10) | 101 (0.13) | 0.186 | 286 (0.12) |
| Hypercholesterolemia | 10023 (12.99) | 10266 (13.64) | 9681 (12.14) | <0.001 | 29970 (12.91) |
| Coronary artery disease | 7647 (9.91) | 7234 (9.61) | 6908 (8.66) | <0.001 | 21789 (9.39) |
| Disorders of eating | 85 (0.11) | 108 (0.14) | 109 (0.14) | 0.160 | 302 (0.13) |

SD, standard deviation; CCI score, Charlson Comorbidity Index score.
The tertile values, in ppb, were as follows: T1: < 3.59; T2: ≥ 3.59 and < 4.04; T3: ≥ 4.04.
The chi-squared test or one-way analysis of variance among tertiles of sulfur dioxide.
Urbanization level was defined at the beginning of the follow-up period.
Insurance amount was measured as the average value during the period of air pollutant exposure assessment.
Comorbidities were defined before the survival date.

**Table S1-2. Characteristics of the study population among tertiles of CO exposure**

| **Characteristic** | **Tertiles of average daily CO, n (%)** | | | **P value** | **Total (N = 232125)** |
| --- | --- | --- | --- | --- | --- |
| **T1 (lowest) (n = 77375)** | **T2 (n = 77375)** | **T3 (highest) (n = 77375)** |
| **Infertility** | 443 (0.57) | 1351 (1.75) | 3187 (4.12) | <0.001 | 4981 (2.15) |
| **Age, years** |  |  |  | <0.001 |  |
| 15-35 | 35622 (46.04) | 42545 (54.99) | 43565 (56.30) |  | 121732 (52.44) |
| 36-60 | 41753 (53.96) | 34830 (45.01) | 33810 (43.70) |  | 110393 (47.56) |
| Mean ± SD | 36.74 ± 12.53 | 34.30 ± 12.59 | 34.19 ± 12.07 | <0.001 | 35.08 ± 12.45 |
| **Urbanization level** |  |  |  | <0.001 |  |
| 1 (highest) | 44483 (57.49) | 44068 (56.95) | 50330 (65.05) |  | 138881 (59.83) |
| 2 | 24683 (31.90) | 27441 (35.46) | 19032 (24.60) |  | 71156 (30.65) |
| 3 | 5456 (7.05) | 3683 (4.76) | 5141 (6.64) |  | 14280 (6.15) |
| 4 (lowest) | 217 (0.28) | 694 (0.90) | 915 (1.18) |  | 1826 (0.79) |
| unknown | 2536 (3.28) | 1489 (1.92) | 1957 (2.53) |  | 5982 (2.58) |
| **Insurance amount, NT$** |  |  |  | <0.001 |  |
| financially dependent | 526 (0.68) | 358 (0.46) | 459 (0.59) |  | 1343 (0.58) |
| 1-19999 | 25360 (32.78) | 29569 (38.22) | 24939 (32.23) |  | 79868 (34.41) |
| 20000-39999 | 37492 (48.45) | 33283 (43.02) | 32100 (41.49) |  | 102875 (44.32) |
| ≥40000 | 11688 (15.11) | 11780 (15.22) | 17559 (22.69) |  | 41027 (17.67) |
| unknown | 2309 (2.98) | 2385 (3.08) | 2318 (3.00) |  | 7012 (3.02) |
| **CCI score** |  |  |  | <0.001 |  |
| Mean ± SD | 1.22 ± 1.75 | 1.05 ± 1.65 | 1.02 ± 1.64 |  | 1.10 ± 1.68 |
| **Comorbidity** |  |  |  |  |  |
| Inflammatory disease of the ovary, fallopian tube, pelvic cellular tissue, and peritoneum | 13350 (17.25) | 11930 (15.42) | 10646 (13.76) | <0.001 | 35926 (15.48) |
| Inflammatory disease of the uterus | 3834 (4.96) | 3688 (4.77) | 4719 (6.10) | <0.001 | 12241 (5.27) |
| Inflammatory disease of the cervix, vagina, and vulva | 36392 (47.03) | 35608 (46.02) | 35803 (46.27) | <0.001 | 107803 (46.44) |
| Endometriosis | 2762 (3.57) | 2926 (3.78) | 3140 (4.06) | <0.001 | 8828 (3.80) |
| Hypertension | 15178 (19.62) | 12237 (15.82) | 11350 (14.67) | <0.001 | 38765 (16.70) |
| Diabetes mellitus | 10733 (13.87) | 8619 (11.14) | 7973 (10.30) | <0.001 | 27325 (11.77) |
| Hypertriglyceridemia | 117 (0.15) | 97 (0.13) | 72 (0.09) | 0.005 | 286 (0.12) |
| Hypercholesterolemia | 11086 (14.33) | 9078 (11.73) | 9806 (12.67) | <0.001 | 29970 (12.91) |
| Coronary artery disease | 8881 (11.48) | 6613 (8.55) | 6295 (8.14) | <0.001 | 21789 (9.39) |
| Disorders of eating | 96 (0.12) | 98 (0.13) | 108 (0.14) | 0.663 | 302 (0.13) |

SD, standard deviation; CCI score, Charlson Comorbidity Index score.
The tertile values, in ppm, were as follows: T1: < 0.48; T2: ≥ 0.48 and < 0.59; T3: ≥ 0.59.
The chi-squared test or one-way analysis of variance among tertiles of carbon monoxide.
Urbanization level was defined at the beginning of the follow-up period.
Insurance amount was measured as the average value during the period of air pollutant exposure assessment.
Comorbidities were defined before the survival date.

**Table S1-3. Characteristics of the study population among tertiles of O3 exposure**

| **Characteristic** | **Tertiles of average daily O3, n (%)** | | | **P value** | **Total (N = 232125)** |
| --- | --- | --- | --- | --- | --- |
| **T1 (lowest) (n = 77372)** | **T2 (n = 77365)** | **T3 (highest) (n = 77388)** |
| **Infertility** | 3579 (4.63) | 796 (1.03) | 606 (0.78) | <0.001 | 4981 (2.15) |
| **Age, years** |  |  |  | <0.001 |  |
| 15-35 | 43942 (56.79) | 42758 (55.27) | 35032 (45.27) |  | 121732 (52.44) |
| 36-60 | 33430 (43.21) | 34607 (44.73) | 42356 (54.73) |  | 110393 (47.56) |
| Mean ± SD | 34.06 ± 12.08 | 34.34 ± 12.50 | 36.83 ± 12.59 | <0.001 | 35.08 ± 12.45 |
| **Urbanization level** |  |  |  | <0.001 |  |
| 1 (highest) | 50915 (65.81) | 44176 (57.10) | 43790 (56.58) |  | 138881 (59.83) |
| 2 | 19998 (25.85) | 26042 (33.66) | 25116 (32.45) |  | 71156 (30.65) |
| 3 | 3897 (5.04) | 5092 (6.58) | 5291 (6.84) |  | 14280 (6.15) |
| 4 (lowest) | 672 (0.87) | 428 (0.55) | 726 (0.94) |  | 1826 (0.79) |
| unknown | 1890 (2.44) | 1627 (2.10) | 2465 (3.19) |  | 5982 (2.58) |
| **Insurance amount, NT$** |  |  |  | <0.001 |  |
| financially dependent | 506 (0.65) | 360 (0.47) | 477 (0.62) |  | 1343 (0.58) |
| 1-19999 | 23985 (31.00) | 29866 (38.60) | 26017 (33.62) |  | 79868 (34.41) |
| 20000-39999 | 31844 (41.16) | 34214 (44.22) | 36817 (47.57) |  | 102875 (44.32) |
| ≥40000 | 18699 (24.17) | 10689 (13.82) | 11639 (15.04) |  | 41027 (17.67) |
| unknown | 2338 (3.02) | 2236 (2.89) | 2438 (3.15) |  | 7012 (3.02) |
| **CCI score** |  |  |  | <0.001 |  |
| Mean ± SD | 1.05 ± 1.68 | 1.03 ± 1.61 | 1.22 ± 1.75 |  | 1.10 ± 1.68 |
| **Comorbidity** |  |  |  |  |  |
| Inflammatory disease of the ovary, fallopian tube, pelvic cellular tissue, and peritoneum | 10376 (13.41) | 11893 (15.37) | 13657 (17.65) | <0.001 | 35926 (15.48) |
| Inflammatory disease of the uterus | 4459 (5.76) | 3934 (5.08) | 3848 (4.97) | <0.001 | 12241 (5.27) |
| Inflammatory disease of the cervix, vagina, and vulva | 35754 (46.21) | 36004 (46.54) | 36045 (46.58) | 0.284 | 107803 (46.44) |
| Endometriosis | 3121 (4.03) | 2791 (3.61) | 2916 (3.77) | <0.001 | 8828 (3.80) |
| Hypertension | 11241 (14.53) | 12264 (15.85) | 15260 (19.72) | <0.001 | 38765 (16.70) |
| Diabetes mellitus | 7997 (10.34) | 8529 (11.02) | 10799 (13.95) | <0.001 | 27325 (11.77) |
| Hypertriglyceridemia | 75 (0.10) | 101 (0.13) | 110 (0.14) | 0.031 | 286 (0.12) |
| Hypercholesterolemia | 9617 (12.43) | 9044 (11.69) | 11309 (14.61) | <0.001 | 29970 (12.91) |
| Coronary artery disease | 6365 (8.23) | 6793 (8.78) | 8631 (11.15) | <0.001 | 21789 (9.39) |
| Disorders of eating | 95 (0.12) | 100 (0.13) | 107 (0.14) | 0.698 | 302 (0.13) |

SD, standard deviation; CCI score, Charlson Comorbidity Index score.
The tertile values, in ppb, were as follows: T1: < 27.77; T2: ≥ 27.77 and < 29.11; T3: ≥ 29.11.
The chi-squared test or one-way analysis of variance among tertiles of ozone.
Urbanization level was defined at the beginning of the follow-up period.
Insurance amount was measured as the average value during the period of air pollutant exposure assessment.
Comorbidities were defined before the survival date.

**Table S1-4. Characteristics of the study population among tertiles of PM10 exposure**

| **Characteristic** | **Tertiles of average daily PM10, n (%)** | | | **P value** | **Total (N = 232125)** |
| --- | --- | --- | --- | --- | --- |
| **T1 (lowest) (n = 77360)** | **T2 (n = 72522)** | **T3 (highest) (n = 82243)** |
| **Infertility** | 1243 (1.61) | 1681 (2.32) | 2057 (2.50) | <0.001 | 4981 (2.15) |
| **Age, years** |  |  |  | <0.001 |  |
| 15-35 | 42279 (54.65) | 37015 (51.04) | 42438 (51.60) |  | 121732 (52.44) |
| 36-60 | 35081 (45.35) | 35507 (48.96) | 39805 (48.40) |  | 110393 (47.56) |
| Mean ± SD | 34.64 ± 12.00 | 35.12 ± 12.89 | 35.46 ± 12.46 | <0.001 | 35.08 ± 12.45 |
| **Urbanization level** |  |  |  | <0.001 |  |
| 1 (highest) | 52730 (68.16) | 44124 (60.84) | 42027 (51.10) |  | 138881 (59.83) |
| 2 | 17533 (22.66) | 21382 (29.48) | 32241 (39.20) |  | 71156 (30.65) |
| 3 | 4488 (5.80) | 4654 (6.42) | 5138 (6.25) |  | 14280 (6.15) |
| 4 (lowest) | 767 (0.99) | 375 (0.52) | 684 (0.83) |  | 1826 (0.79) |
| unknown | 1842 (2.38) | 1987 (2.74) | 2153 (2.62) |  | 5982 (2.58) |
| **Insurance amount, NT$** |  |  |  | <0.001 |  |
| financially dependent | 518 (0.67) | 283 (0.39) | 542 (0.66) |  | 1343 (0.58) |
| 1-19999 | 23042 (29.79) | 25477 (35.13) | 31349 (38.12) |  | 79868 (34.41) |
| 20000-39999 | 33075 (42.75) | 32659 (45.03) | 37141 (45.16) |  | 102875 (44.32) |
| ≥40000 | 18714 (24.19) | 11998 (16.54) | 10315 (12.54) |  | 41027 (17.67) |
| unknown | 2011 (2.60) | 2105 (2.90) | 2896 (3.52) |  | 7012 (3.02) |
| **CCI score** |  |  |  | <0.001 |  |
| Mean ± SD | 1.02 ± 1.58 | 1.11 ± 1.70 | 1.16 ± 1.75 |  | 1.10 ± 1.68 |
| **Comorbidity** |  |  |  |  |  |
| Inflammatory disease of the ovary, fallopian tube, pelvic cellular tissue, and peritoneum | 10471 (13.54) | 10635 (14.66) | 14820 (18.02) | <0.001 | 35926 (15.48) |
| Inflammatory disease of the uterus | 4840 (6.26) | 3567 (4.92) | 3834 (4.66) | <0.001 | 12241 (5.27) |
| Inflammatory disease of the cervix, vagina, and vulva | 36151 (46.73) | 33033 (45.55) | 38619 (46.96) | <0.001 | 107803 (46.44) |
| Endometriosis | 3017 (3.90) | 2425 (3.34) | 3386 (4.12) | <0.001 | 8828 (3.80) |
| Hypertension | 12126 (15.67) | 12464 (17.19) | 14175 (17.24) | <0.001 | 38765 (16.70) |
| Diabetes mellitus | 8395 (10.85) | 8775 (12.10) | 10155 (12.35) | <0.001 | 27325 (11.77) |
| Hypertriglyceridemia | 68 (0.09) | 87 (0.12) | 131 (0.16) | <0.001 | 286 (0.12) |
| Hypercholesterolemia | 10567 (13.66) | 9875 (13.62) | 9528 (11.59) | <0.001 | 29970 (12.91) |
| Coronary artery disease | 6785 (8.77) | 7079 (9.76) | 7925 (9.64) | <0.001 | 21789 (9.39) |
| Disorders of eating | 97 (0.13) | 88 (0.12) | 117 (0.14) | 0.473 | 302 (0.13) |

SD, standard deviation; CCI score, Charlson Comorbidity Index score.
The tertile values, in μg/m3, were as follows: T1: < 47.66; T2: ≥ 47.66 and < 56.18; T3: ≥ 56.18.
The chi-squared test or one-way analysis of variance among tertiles of particulate matter <10 μm in aerodynamic diameter.
Urbanization level was defined at the beginning of the follow-up period.
Insurance amount was measured as the average value during the period of air pollutant exposure assessment.
Comorbidities were defined before the survival date.

**Table S1-5. Characteristics of the study population among tertiles of PM2.5 exposure**

| **Characteristic** | **Tertiles of average daily PM2.5, n (%)** | | | **P value** | **Total (N = 232108)** |
| --- | --- | --- | --- | --- | --- |
| **T1 (lowest) (n = 77369)** | **T2 (n = 75510)** | **T3 (highest) (n = 79229)** |
| **Infertility** | 832 (1.08) | 2077 (2.75) | 2064 (2.61) | <0.001 | 4973 (2.14) |
| **Age, years** |  |  |  | <0.001 |  |
| 15-35 | 42347 (54.73) | 39321 (52.07) | 40053 (50.55) |  | 121721 (52.44) |
| 36-60 | 35022 (45.27) | 36189 (47.93) | 39176 (49.45) |  | 110387 (47.56) |
| Mean ± SD | 34.60 ± 11.92 | 34.82 ± 12.92 | 35.79 ± 12.48 | <0.001 | 35.08 ± 12.45 |
| **Urbanization level** |  |  |  | <0.001 |  |
| 1 (highest) | 51416 (66.46) | 46672 (61.81) | 40784 (51.48) |  | 138872 (59.83) |
| 2 | 18860 (24.38) | 21946 (29.06) | 30344 (38.30) |  | 71150 (30.65) |
| 3 | 4421 (5.71) | 4625 (6.13) | 5232 (6.60) |  | 14278 (6.15) |
| 4 (lowest) | 770 (1.00) | 381 (0.50) | 675 (0.85) |  | 1826 (0.79) |
| unknown | 1902 (2.46) | 1886 (2.50) | 2194 (2.77) |  | 5982 (2.58) |
| **Insurance amount, NT$** |  |  |  | <0.001 |  |
| financially dependent | 531 (0.69) | 274 (0.36) | 538 (0.68) |  | 1343 (0.58) |
| 1-19999 | 24000 (31.02) | 26203 (34.70) | 29655 (37.43) |  | 79858 (34.41) |
| 20000-39999 | 32677 (42.24) | 33785 (44.74) | 36410 (45.96) |  | 102872 (44.32) |
| ≥40000 | 18101 (23.40) | 13090 (17.34) | 9834 (12.41) |  | 41025 (17.67) |
| unknown | 2060 (2.66) | 2158 (2.86) | 2792 (3.52) |  | 7010 (3.02) |
| **CCI score** |  |  |  | <0.001 |  |
| Mean ± SD | 1.01 ± 1.56 | 1.10 ± 1.69 | 1.18 ± 1.78 |  | 1.10 ± 1.68 |
| **Comorbidity** |  |  |  |  |  |
| Inflammatory disease of the ovary, fallopian tube, pelvic cellular tissue, and peritoneum | 11040 (14.27) | 10639 (14.09) | 14247 (17.98) | <0.001 | 35926 (15.48) |
| Inflammatory disease of the uterus | 4693 (6.07) | 3833 (5.08) | 3713 (4.69) | <0.001 | 12239 (5.27) |
| Inflammatory disease of the cervix, vagina, and vulva | 36314 (46.94) | 34478 (45.66) | 37007 (46.71) | <0.001 | 107799 (46.44) |
| Endometriosis | 2936 (3.79) | 2688 (3.56) | 3204 (4.04) | <0.001 | 8828 (3.80) |
| Hypertension | 12048 (15.57) | 12759 (16.90) | 13955 (17.61) | <0.001 | 38762 (16.70) |
| Diabetes mellitus | 8331 (10.77) | 9011 (11.93) | 9979 (12.60) | <0.001 | 27321 (11.77) |
| Hypertriglyceridemia | 55 (0.07) | 99 (0.13) | 132 (0.17) | <0.001 | 286 (0.12) |
| Hypercholesterolemia | 10613 (13.72) | 9853 (13.05) | 9503 (11.99) | <0.001 | 29969 (12.91) |
| Coronary artery disease | 6482 (8.38) | 7322 (9.70) | 7982 (10.07) | <0.001 | 21786 (9.39) |
| Disorders of eating | 94 (0.12) | 97 (0.13) | 111 (0.14) | 0.587 | 302 (0.13) |

SD, standard deviation; CCI score, Charlson Comorbidity Index score.
The tertile values, in μg/m3, were as follows: T1: < 27.67; T2: ≥ 27.67 and < 34.95; T3: ≥ 34.95.
The chi-squared test or one-way analysis of variance among tertiles of particulate matter <2.5 μm in aerodynamic diameter.
Urbanization level was defined at the beginning of the follow-up period.
Insurance amount was measured as the average value during the period of air pollutant exposure assessment.
Comorbidities were defined before the survival date.

**Table S1-6. Characteristics of the study population among tertiles of NOX exposure**

| **Characteristic** | **Tertiles of average daily NOX, n (%)** | | | **P value** | **Total (N = 232125)** |
| --- | --- | --- | --- | --- | --- |
| **T1 (lowest) (n = 77370)** | **T2 (n = 77380)** | **T3 (highest) (n = 77375)** |
| **Infertility** | 603 (0.78) | 1778 (2.30) | 2600 (3.36) | <0.001 | 4981 (2.15) |
| **Age, years** |  |  |  | <0.001 |  |
| 15-35 | 34986 (45.22) | 43061 (55.65) | 43685 (56.46) |  | 121732 (52.44) |
| 36-60 | 42384 (54.78) | 34319 (44.35) | 33690 (43.54) |  | 110393 (47.56) |
| Mean ± SD | 36.96 ± 12.46 | 34.13 ± 12.64 | 34.14 ± 12.04 | <0.001 | 35.08 ± 12.45 |
| **Urbanization level** |  |  |  | <0.001 |  |
| 1 (highest) | 44856 (57.98) | 43582 (56.32) | 50443 (65.19) |  | 138881 (59.83) |
| 2 | 24451 (31.60) | 27768 (35.89) | 18937 (24.47) |  | 71156 (30.65) |
| 3 | 5294 (6.84) | 3836 (4.96) | 5150 (6.66) |  | 14280 (6.15) |
| 4 (lowest) | 189 (0.24) | 716 (0.93) | 921 (1.19) |  | 1826 (0.79) |
| unknown | 2580 (3.33) | 1478 (1.91) | 1924 (2.49) |  | 5982 (2.58) |
| **Insurance amount, NT$** |  |  |  | <0.001 |  |
| financially dependent | 540 (0.70) | 341 (0.44) | 462 (0.60) |  | 1343 (0.58) |
| 1-19999 | 25269 (32.66) | 29873 (38.61) | 24726 (31.96) |  | 79868 (34.41) |
| 20000-39999 | 37360 (48.29) | 33187 (42.89) | 32328 (41.78) |  | 102875 (44.32) |
| ≥40000 | 11876 (15.35) | 11566 (14.95) | 17585 (22.73) |  | 41027 (17.67) |
| unknown | 2325 (3.01) | 2413 (3.12) | 2274 (2.94) |  | 7012 (3.02) |
| **CCI score** |  |  |  | <0.001 |  |
| Mean ± SD | 1.25 ± 1.77 | 1.05 ± 1.66 | 0.99 ± 1.59 |  | 1.10 ± 1.68 |
| **Comorbidity** |  |  |  |  |  |
| Inflammatory disease of the ovary, fallopian tube, pelvic cellular tissue, and peritoneum | 13287 (17.17) | 11949 (15.44) | 10690 (13.82) | <0.001 | 35926 (15.48) |
| Inflammatory disease of the uterus | 3771 (4.87) | 3722 (4.81) | 4748 (6.14) | <0.001 | 12241 (5.27) |
| Inflammatory disease of the cervix, vagina, and vulva | 36381 (47.02) | 35503 (45.88) | 35919 (46.42) | <0.001 | 107803 (46.44) |
| Endometriosis | 2764 (3.57) | 2925 (3.78) | 3139 (4.06) | <0.001 | 8828 (3.80) |
| Hypertension | 15374 (19.87) | 12055 (15.58) | 11336 (14.65) | <0.001 | 38765 (16.70) |
| Diabetes mellitus | 10952 (14.16) | 8498 (10.98) | 7875 (10.18) | <0.001 | 27325 (11.77) |
| Hypertriglyceridemia | 116 (0.15) | 98 (0.13) | 72 (0.09) | 0.006 | 286 (0.12) |
| Hypercholesterolemia | 11263 (14.56) | 8916 (11.52) | 9791 (12.65) | <0.001 | 29970 (12.91) |
| Coronary artery disease | 9070 (11.72) | 6515 (8.42) | 6204 (8.02) | <0.001 | 21789 (9.39) |
| Disorders of eating | 91 (0.12) | 100 (0.13) | 111 (0.14) | 0.369 | 302 (0.13) |

SD, standard deviation; CCI score, Charlson Comorbidity Index score.
The tertile values, in ppb, were as follows: T1: < 21.44; T2: ≥ 21.44 and < 29.60; T3: ≥ 29.60.
The chi-squared test or one-way analysis of variance among tertiles of nitrogen oxides.
Urbanization level was defined at the beginning of the follow-up period.
Insurance amount was measured as the average value during the period of air pollutant exposure assessment.
Comorbidities were defined before the survival date.

**Table S1-7. Characteristics of the study population among tertiles of NO exposure**

| **Characteristic** | **Tertiles of average daily NO, n (%)** | | | **P value** | **Total (N = 232125)** |
| --- | --- | --- | --- | --- | --- |
| **T1 (lowest) (n = 77375)** | **T2 (n = 77374)** | **T3 (highest) (n = 77376)** |
| **Infertility** | 561 (0.73) | 1839 (2.38) | 2581 (3.34) | <0.001 | 4981 (2.15) |
| **Age, years** |  |  |  | <0.001 |  |
| 15-35 | 35749 (46.20) | 41842 (54.08) | 44141 (57.05) |  | 121732 (52.44) |
| 36-60 | 41626 (53.80) | 35532 (45.92) | 33235 (42.95) |  | 110393 (47.56) |
| Mean ± SD | 36.83 ± 12.42 | 34.51 ± 12.57 | 33.90 ± 12.18 | <0.001 | 35.08 ± 12.45 |
| **Urbanization level** |  |  |  | <0.001 |  |
| 1 (highest) | 42459 (54.87) | 44567 (57.60) | 51855 (67.02) |  | 138881 (59.83) |
| 2 | 26281 (33.97) | 27572 (35.63) | 17303 (22.36) |  | 71156 (30.65) |
| 3 | 5887 (7.61) | 2824 (3.65) | 5569 (7.20) |  | 14280 (6.15) |
| 4 (lowest) | 167 (0.22) | 685 (0.89) | 974 (1.26) |  | 1826 (0.79) |
| unknown | 2581 (3.34) | 1726 (2.23) | 1675 (2.16) |  | 5982 (2.58) |
| **Insurance amount, NT$** |  |  |  | <0.001 |  |
| financially dependent | 567 (0.73) | 383 (0.50) | 393 (0.51) |  | 1343 (0.58) |
| 1-19999 | 25682 (33.19) | 29423 (38.03) | 24763 (32.00) |  | 79868 (34.41) |
| 20000-39999 | 37531 (48.51) | 32508 (42.01) | 32836 (42.44) |  | 102875 (44.32) |
| ≥40000 | 11127 (14.38) | 12644 (16.34) | 17256 (22.30) |  | 41027 (17.67) |
| unknown | 2468 (3.19) | 2416 (3.12) | 2128 (2.75) |  | 7012 (3.02) |
| **CCI score** |  |  |  | <0.001 |  |
| Mean ± SD | 1.23 ± 1.76 | 1.08 ± 1.69 | 0.98 ± 1.58 |  | 1.10 ± 1.68 |
| **Comorbidity** |  |  |  |  |  |
| Inflammatory disease of the ovary, fallopian tube, pelvic cellular tissue, and peritoneum | 13241 (17.11) | 12540 (16.21) | 10145 (13.11) | <0.001 | 35926 (15.48) |
| Inflammatory disease of the uterus | 3548 (4.59) | 3860 (4.99) | 4833 (6.25) | <0.001 | 12241 (5.27) |
| Inflammatory disease of the cervix, vagina, and vulva | 36347 (46.98) | 35805 (46.28) | 35651 (46.08) | <0.001 | 107803 (46.44) |
| Endometriosis | 2742 (3.54) | 3035 (3.92) | 3051 (3.94) | <0.001 | 8828 (3.80) |
| Hypertension | 15120 (19.54) | 12413 (16.04) | 11232 (14.52) | <0.001 | 38765 (16.70) |
| Diabetes mellitus | 10708 (13.84) | 8831 (11.41) | 7786 (10.06) | <0.001 | 27325 (11.77) |
| Hypertriglyceridemia | 122 (0.16) | 99 (0.13) | 65 (0.08) | <0.001 | 286 (0.12) |
| Hypercholesterolemia | 10676 (13.80) | 9182 (11.87) | 10112 (13.07) | <0.001 | 29970 (12.91) |
| Coronary artery disease | 8928 (11.54) | 6553 (8.47) | 6308 (8.15) | <0.001 | 21789 (9.39) |
| Disorders of eating | 83 (0.11) | 112 (0.14) | 107 (0.14) | 0.092 | 302 (0.13) |

SD, standard deviation; CCI score, Charlson Comorbidity Index score.
The tertile values, in ppb, were as follows: T1: < 4.93; T2: ≥ 4.93 and < 8.51; T3: ≥ 8.51.
The chi-squared test or one-way analysis of variance among tertiles of nitric oxide.
Urbanization level was defined at the beginning of the follow-up period.
Insurance amount was measured as the average value during the period of air pollutant exposure assessment.
Comorbidities were defined before the survival date.

**Table S1-8. Characteristics of the study population among tertiles of NO2 exposure**

| **Characteristic** | **Tertiles of average daily NO2, n (%)** | | | **P value** | **Total (N = 232125)** |
| --- | --- | --- | --- | --- | --- |
| **T1 (lowest) (n = 77348)** | **T2 (n = 77402)** | **T3 (highest) (n = 77375)** |
| **Infertility** | 675 (0.87) | 1506 (1.95) | 2800 (3.62) | <0.001 | 4981 (2.15) |
| **Age, years** |  |  |  | <0.001 |  |
| 15-35 | 35143 (45.43) | 42781 (55.27) | 43808 (56.62) |  | 121732 (52.44) |
| 36-60 | 42205 (54.57) | 34621 (44.73) | 33567 (43.38) |  | 110393 (47.56) |
| Mean ± SD | 36.86 ± 12.60 | 34.26 ± 12.52 | 34.11 ± 12.04 | <0.001 | 35.08 ± 12.45 |
| **Urbanization level** |  |  |  | <0.001 |  |
| 1 (highest) | 44654 (57.73) | 44243 (57.16) | 49984 (64.60) |  | 138881 (59.83) |
| 2 | 24483 (31.65) | 26882 (34.73) | 19791 (25.58) |  | 71156 (30.65) |
| 3 | 5530 (7.15) | 3970 (5.13) | 4780 (6.18) |  | 14280 (6.15) |
| 4 (lowest) | 231 (0.30) | 715 (0.92) | 880 (1.14) |  | 1826 (0.79) |
| unknown | 2450 (3.17) | 1592 (2.06) | 1940 (2.51) |  | 5982 (2.58) |
| **Insurance amount, NT$** |  |  |  | <0.001 |  |
| financially dependent | 518 (0.67) | 365 (0.47) | 460 (0.59) |  | 1343 (0.58) |
| 1-19999 | 25431 (32.88) | 29321 (37.88) | 25116 (32.46) |  | 79868 (34.41) |
| 20000-39999 | 37288 (48.21) | 33435 (43.20) | 32152 (41.55) |  | 102875 (44.32) |
| ≥40000 | 11864 (15.34) | 11791 (15.23) | 17372 (22.45) |  | 41027 (17.67) |
| unknown | 2247 (2.91) | 2490 (3.22) | 2275 (2.94) |  | 7012 (3.02) |
| **CCI score** |  |  |  | <0.001 |  |
| Mean ± SD | 1.24 ± 1.78 | 1.05 ± 1.64 | 1.00 ± 1.61 |  | 1.10 ± 1.68 |
| **Comorbidity** |  |  |  |  |  |
| Inflammatory disease of the ovary, fallopian tube, pelvic cellular tissue, and peritoneum | 12929 (16.72) | 12025 (15.54) | 10972 (14.18) | <0.001 | 35926 (15.48) |
| Inflammatory disease of the uterus | 3858 (4.99) | 3719 (4.80) | 4664 (6.03) | <0.001 | 12241 (5.27) |
| Inflammatory disease of the cervix, vagina, and vulva | 36192 (46.79) | 35654 (46.06) | 35957 (46.47) | 0.016 | 107803 (46.44) |
| Endometriosis | 2663 (3.44) | 2978 (3.85) | 3187 (4.12) | <0.001 | 8828 (3.80) |
| Hypertension | 15355 (19.85) | 12164 (15.72) | 11246 (14.53) | <0.001 | 38765 (16.70) |
| Diabetes mellitus | 10878 (14.06) | 8563 (11.06) | 7884 (10.19) | <0.001 | 27325 (11.77) |
| Hypertriglyceridemia | 112 (0.14) | 104 (0.13) | 70 (0.09) | 0.005 | 286 (0.12) |
| Hypercholesterolemia | 11304 (14.61) | 9077 (11.73) | 9589 (12.39) | <0.001 | 29970 (12.91) |
| Coronary artery disease | 9100 (11.77) | 6517 (8.42) | 6172 (7.98) | <0.001 | 21789 (9.39) |
| Disorders of eating | 92 (0.12) | 95 (0.12) | 115 (0.15) | 0.211 | 302 (0.13) |

SD, standard deviation; CCI score, Charlson Comorbidity Index score.
The tertile values, in ppb, were as follows: T1: < 16.55; T2: ≥ 16.55 and < 20.49; T3: ≥ 20.49.
The chi-squared test or one-way analysis of variance among tertiles of nitrogen dioxide.
Urbanization level was defined at the beginning of the follow-up period.
Insurance amount was measured as the average value during the period of air pollutant exposure assessment.
Comorbidities were defined before the survival date.

**Table S1-9. Characteristics of the study population among tertiles of THC exposure**

| **Characteristic** | **Tertiles of average daily THC, n (%)** | | | **P value** | **Total (N = 230449)** |
| --- | --- | --- | --- | --- | --- |
| **T1 (lowest) (n = 76816)** | **T2 (n = 76816)** | **T3 (highest) (n = 76817)** |
| **Infertility** | 268 (0.35) | 1084 (1.41) | 3608 (4.70) | <0.001 | 4960 (2.15) |
| **Age, years** |  |  |  | <0.001 |  |
| 15-35 | 37769 (49.17) | 40631 (52.89) | 42444 (55.25) |  | 120844 (52.44) |
| 36-60 | 39047 (50.83) | 36185 (47.11) | 34373 (44.75) |  | 109605 (47.56) |
| Mean ± SD | 35.86 ± 12.35 | 34.77 ± 12.89 | 34.59 ± 12.08 | <0.001 | 35.07 ± 12.46 |
| **Urbanization level** |  |  |  | <0.001 |  |
| 1 (highest) | 43307 (56.38) | 44391 (57.79) | 50043 (65.15) |  | 137741 (59.77) |
| 2 | 26857 (34.96) | 25085 (32.66) | 18727 (24.38) |  | 70669 (30.67) |
| 3 | 4108 (5.35) | 4913 (6.40) | 5240 (6.82) |  | 14261 (6.19) |
| 4 (lowest) | 112 (0.15) | 800 (1.04) | 914 (1.19) |  | 1826 (0.79) |
| unknown | 2432 (3.17) | 1627 (2.12) | 1893 (2.46) |  | 5952 (2.58) |
| **Insurance amount, NT$** |  |  |  | <0.001 |  |
| financially dependent | 508 (0.66) | 362 (0.47) | 453 (0.59) |  | 1323 (0.57) |
| 1-19999 | 27770 (36.15) | 26329 (34.28) | 25428 (33.10) |  | 79527 (34.51) |
| 20000-39999 | 34404 (44.79) | 35711 (46.49) | 32083 (41.77) |  | 102198 (44.35) |
| ≥40000 | 11666 (15.19) | 12161 (15.83) | 16604 (21.62) |  | 40431 (17.54) |
| unknown | 2468 (3.21) | 2253 (2.93) | 2249 (2.93) |  | 6970 (3.02) |
| **CCI score** |  |  |  | <0.001 |  |
| Mean ± SD | 1.13 ± 1.65 | 1.09 ± 1.67 | 1.07 ± 1.72 |  | 1.10 ± 1.68 |
| **Comorbidity** |  |  |  |  |  |
| Inflammatory disease of the ovary, fallopian tube, pelvic cellular tissue, and peritoneum | 12549 (16.34) | 12323 (16.04) | 10789 (14.05) | <0.001 | 35661 (15.47) |
| Inflammatory disease of the uterus | 3805 (4.95) | 3873 (5.04) | 4502 (5.86) | <0.001 | 12180 (5.29) |
| Inflammatory disease of the cervix, vagina, and vulva | 36221 (47.15) | 35147 (45.75) | 35562 (46.29) | <0.001 | 106930 (46.40) |
| Endometriosis | 2860 (3.72) | 3003 (3.91) | 2905 (3.78) | 0.149 | 8768 (3.80) |
| Hypertension | 13932 (18.14) | 12885 (16.77) | 11671 (15.19) | <0.001 | 38488 (16.70) |
| Diabetes mellitus | 9715 (12.65) | 8926 (11.62) | 8478 (11.04) | <0.001 | 27119 (11.77) |
| Hypertriglyceridemia | 128 (0.17) | 98 (0.13) | 60 (0.08) | <0.001 | 286 (0.12) |
| Hypercholesterolemia | 9370 (12.20) | 10162 (13.23) | 10239 (13.33) | <0.001 | 29771 (12.92) |
| Coronary artery disease | 7945 (10.34) | 7164 (9.33) | 6523 (8.49) | <0.001 | 21632 (9.39) |
| Disorders of eating | 94 (0.12) | 104 (0.14) | 104 (0.14) | 0.718 | 302 (0.13) |

SD, standard deviation; CCI score, Charlson Comorbidity Index score.
The tertile values, in ppm, were as follows: T1: < 2.17; T2: ≥ 2.17 and < 2.31; T3: ≥ 2.31.
The chi-squared test or one-way analysis of variance among tertiles of total hydrocarbons.
Urbanization level was defined at the beginning of the follow-up period.
Insurance amount was measured as the average value during the period of air pollutant exposure assessment.
Comorbidities were defined before the survival date.

**Table S1-10. Characteristics of the study population among tertiles of NMHC exposure**

| **Characteristic** | **Tertiles of average daily NMHC, n (%)** | | | **P value** | **Total (N = 230449)** |
| --- | --- | --- | --- | --- | --- |
| **T1 (lowest) (n = 76813)** | **T2 (n = 76819)** | **T3 (highest) (n = 76817)** |
| **Infertility** | 541 (0.70) | 1786 (2.32) | 2633 (3.43) | <0.001 | 4960 (2.15) |
| **Age, years** |  |  |  | <0.001 |  |
| 15-35 | 36591 (47.64) | 41096 (53.50) | 43157 (56.18) |  | 120844 (52.44) |
| 36-60 | 40222 (52.36) | 35723 (46.50) | 33660 (43.82) |  | 109605 (47.56) |
| Mean ± SD | 36.40 ± 12.38 | 34.60 ± 12.87 | 34.23 ± 12.01 | <0.001 | 35.07 ± 12.46 |
| **Urbanization level** |  |  |  | <0.001 |  |
| 1 (highest) | 43597 (56.76) | 43689 (56.87) | 50455 (65.68) |  | 137741 (59.77) |
| 2 | 24955 (32.49) | 27590 (35.92) | 18124 (23.59) |  | 70669 (30.67) |
| 3 | 5743 (7.48) | 3056 (3.98) | 5462 (7.11) |  | 14261 (6.19) |
| 4 (lowest) | 135 (0.18) | 733 (0.95) | 958 (1.25) |  | 1826 (0.79) |
| unknown | 2383 (3.10) | 1751 (2.28) | 1818 (2.37) |  | 5952 (2.58) |
| **Insurance amount, NT$** |  |  |  | <0.001 |  |
| financially dependent | 569 (0.74) | 316 (0.41) | 438 (0.57) |  | 1323 (0.57) |
| 1-19999 | 25043 (32.60) | 28853 (37.56) | 25631 (33.37) |  | 79527 (34.51) |
| 20000-39999 | 37106 (48.31) | 33138 (43.14) | 31954 (41.60) |  | 102198 (44.35) |
| ≥40000 | 11678 (15.20) | 12108 (15.76) | 16645 (21.67) |  | 40431 (17.54) |
| unknown | 2417 (3.15) | 2404 (3.13) | 2149 (2.80) |  | 6970 (3.02) |
| **CCI score** |  |  |  | <0.001 |  |
| Mean ± SD | 1.20 ± 1.72 | 1.09 ± 1.71 | 1.00 ± 1.61 |  | 1.10 ± 1.68 |
| **Comorbidity** |  |  |  |  |  |
| Inflammatory disease of the ovary, fallopian tube, pelvic cellular tissue, and peritoneum | 13082 (17.03) | 11889 (15.48) | 10690 (13.92) | <0.001 | 35661 (15.47) |
| Inflammatory disease of the uterus | 3813 (4.96) | 3713 (4.83) | 4654 (6.06) | <0.001 | 12180 (5.29) |
| Inflammatory disease of the cervix, vagina, and vulva | 36308 (47.27) | 34862 (45.38) | 35760 (46.55) | <0.001 | 106930 (46.40) |
| Endometriosis | 2754 (3.59) | 3139 (4.09) | 2875 (3.74) | <0.001 | 8768 (3.80) |
| Hypertension | 14552 (18.94) | 12534 (16.32) | 11402 (14.84) | <0.001 | 38488 (16.70) |
| Diabetes mellitus | 10280 (13.38) | 8856 (11.53) | 7983 (10.39) | <0.001 | 27119 (11.77) |
| Hypertriglyceridemia | 124 (0.16) | 107 (0.14) | 55 (0.07) | <0.001 | 286 (0.12) |
| Hypercholesterolemia | 10261 (13.36) | 9404 (12.24) | 10106 (13.16) | <0.001 | 29771 (12.92) |
| Coronary artery disease | 8537 (11.11) | 6912 (9.00) | 6183 (8.05) | <0.001 | 21632 (9.39) |
| Disorders of eating | 88 (0.11) | 115 (0.15) | 99 (0.13) | 0.160 | 302 (0.13) |

SD, standard deviation; CCI score, Charlson Comorbidity Index score.
The tertile values, in ppm, were as follows: T1: < 0.25; T2: ≥ 0.25 and < 0.33; T3: ≥ 0.33.
The chi-squared test or one-way analysis of variance among tertiles of non-methane hydrocarbon.
Urbanization level was defined at the beginning of the follow-up period.
Insurance amount was measured as the average value during the period of air pollutant exposure assessment.
Comorbidities were defined before the survival date.

**Table S1-11. Characteristics of the study population among tertiles of CH4 exposure**

| **Characteristic** | **Tertiles of average daily CH4, n (%)** | | | **P value** | **Total (N = 230449)** |
| --- | --- | --- | --- | --- | --- |
| **T1 (lowest) (n = 76816)** | **T2 (n = 72513)** | **T3 (highest) (n = 81120)** |
| **Infertility** | 335 (0.44) | 451 (0.62) | 4174 (5.15) | <0.001 | 4960 (2.15) |
| **Age, years** |  |  |  | <0.001 |  |
| 15-35 | 38313 (49.88) | 37390 (51.56) | 45141 (55.65) |  | 120844 (52.44) |
| 36-60 | 38503 (50.12) | 35123 (48.44) | 35979 (44.35) |  | 109605 (47.56) |
| Mean ± SD | 35.60 ± 12.38 | 35.04 ± 12.63 | 34.60 ± 12.36 | <0.001 | 35.07 ± 12.46 |
| **Urbanization level** |  |  |  | <0.001 |  |
| 1 (highest) | 41729 (54.32) | 45047 (62.12) | 50965 (62.83) |  | 137741 (59.77) |
| 2 | 28523 (37.13) | 18509 (25.53) | 23637 (29.14) |  | 70669 (30.67) |
| 3 | 3935 (5.12) | 6177 (8.52) | 4149 (5.11) |  | 14261 (6.19) |
| 4 (lowest) | 144 (0.19) | 1364 (1.88) | 318 (0.39) |  | 1826 (0.79) |
| unknown | 2485 (3.23) | 1416 (1.95) | 2051 (2.53) |  | 5952 (2.58) |
| **Insurance amount, NT$** |  |  |  | <0.001 |  |
| financially dependent | 469 (0.61) | 342 (0.47) | 512 (0.63) |  | 1323 (0.57) |
| 1-19999 | 29175 (37.98) | 25510 (35.18) | 24842 (30.62) |  | 79527 (34.51) |
| 20000-39999 | 33013 (42.98) | 32708 (45.11) | 36477 (44.97) |  | 102198 (44.35) |
| ≥40000 | 11532 (15.01) | 11932 (16.45) | 16967 (20.92) |  | 40431 (17.54) |
| unknown | 2627 (3.42) | 2021 (2.79) | 2322 (2.86) |  | 6970 (3.02) |
| **CCI score** |  |  |  | <0.001 |  |
| Mean ± SD | 1.10 ± 1.63 | 1.07 ± 1.61 | 1.13 ± 1.79 |  | 1.10 ± 1.68 |
| **Comorbidity** |  |  |  |  |  |
| Inflammatory disease of the ovary, fallopian tube, pelvic cellular tissue, and peritoneum | 12245 (15.94) | 10872 (14.99) | 12544 (15.46) | <0.001 | 35661 (15.47) |
| Inflammatory disease of the uterus | 3899 (5.08) | 4280 (5.90) | 4001 (4.93) | <0.001 | 12180 (5.29) |
| Inflammatory disease of the cervix, vagina, and vulva | 35936 (46.78) | 33596 (46.33) | 37398 (46.10) | 0.023 | 106930 (46.40) |
| Endometriosis | 2987 (3.89) | 2626 (3.62) | 3155 (3.89) | 0.008 | 8768 (3.80) |
| Hypertension | 13657 (17.78) | 12520 (17.27) | 12311 (15.18) | <0.001 | 38488 (16.70) |
| Diabetes mellitus | 9447 (12.30) | 8545 (11.78) | 9127 (11.25) | <0.001 | 27119 (11.77) |
| Hypertriglyceridemia | 115 (0.15) | 76 (0.10) | 95 (0.12) | 0.038 | 286 (0.12) |
| Hypercholesterolemia | 9286 (12.09) | 10148 (13.99) | 10337 (12.74) | <0.001 | 29771 (12.92) |
| Coronary artery disease | 7533 (9.81) | 6883 (9.49) | 7216 (8.90) | <0.001 | 21632 (9.39) |
| Disorders of eating | 92 (0.12) | 93 (0.13) | 117 (0.14) | 0.393 | 302 (0.13) |

SD, standard deviation; CCI score, Charlson Comorbidity Index score.
The tertile values, in ppm, were as follows: T1: < 1.93; T2: ≥ 1.93 and < 1.97; T3: ≥ 1.97.
The chi-squared test or one-way analysis of variance among tertiles of methane.
Urbanization level was defined at the beginning of the follow-up period.
Insurance amount was measured as the average value during the period of air pollutant exposure assessment.
Comorbidities were defined before the survival date.

Table S2. Pearson’s correlation analysis for air pollutants over the exposure period

|  | SO2 | CO2 | CO | O3 | PM10 | PM2.5 | NOX | NO | NO2 | THC | NMHC | CH4 |
| --- | --- | --- | --- | --- | --- | --- | --- | --- | --- | --- | --- | --- |
| SO2 | 1.000 | **-0.029***** | **0.161***** | **0.042***** | 0.622*** | 0.606*** | **0.229***** | **0.036***** | 0.409*** | **0.044***** | **0.131***** | **-0.086***** |
| CO2 |  | 1.000 | **-0.262***** | -0.002 | 0.410*** | 0.308*** | **-0.235***** | -0.313*** | **-0.139***** | -0.476*** | -0.408*** | -0.347*** |
| CO |  |  | 1.000 | -0.637*** | -0.358*** | **-0.281***** | 0.970*** | 0.938*** | 0.902*** | 0.670*** | 0.851*** | **0.136***** |
| O3 |  |  |  | 1.000 | 0.403*** | 0.357*** | -0.607*** | -0.547*** | -0.608*** | -0.396*** | -0.482*** | **-0.102***** |
| PM10 |  |  |  |  | 1.000 | 0.937*** | -0.305*** | -0.478*** | **-0.090***** | -0.331*** | -0.408*** | **-0.085***** |
| PM2.5 |  |  |  |  |  | 1.000 | **-0.258***** | -0.450*** | **-0.028***** | -0.393*** | -0.406*** | **-0.199***** |
| NOX |  |  |  |  |  |  | 1.000 | 0.952*** | 0.946*** | 0.685*** | 0.841*** | **0.175***** |
| NO |  |  |  |  |  |  |  | 1.000 | 0.802*** | 0.769*** | 0.886*** | **0.269***** |
| NO2 |  |  |  |  |  |  |  |  | 1.000 | 0.524*** | 0.705*** | **0.057***** |
| THC |  |  |  |  |  |  |  |  |  | 1.000 | 0.836*** | 0.736*** |
| NMHC |  |  |  |  |  |  |  |  |  |  | 1.000 | **0.244***** |
| CH4 |  |  |  |  |  |  |  |  |  |  |  | 1.000 |

SO2, sulfur dioxide; CO2, carbon dioxide; CO, carbon monoxide; O3, ozone; PM10, particulate matter < 10 μm in size; PM2.5, particulate matter < 2.5 μm in size; NOX, nitrogen oxides; NO, nitrogen monoxide; NO2, nitrogen dioxide; THC, total hydrocarbons; NMHC, nonmethane hydrocarbons; CH4, methane.
***Correlation significant at the 0.001 level (two-tailed).

|Correlation coefficient values| <0.3 denote a low strength of correlation, which qualified as the controlling pollutant in multiple-pollutant models of targeted pollutants.

Table S3. Hazard ratios of long-term O3 exposure at a 1.73-ppb increment associated with the incidence of Infertility

| Population | Controlling pollutant | Adjusted HR (95% CI) | P value |
| --- | --- | --- | --- |
| Total (N = 232125) | - | 0.48 (0.47,0.49) | < 0.001 |
| SO2 | 0.38 (0.36,0.39) | < 0.001 |
| CH4 | 0.40 (0.38,0.41) | < 0.001 |
| SO2, CH4 | 0.40 (0.38,0.42) | < 0.001 |

HR, hazard ratio; CI, confidence interval; O3, ozone; SO2, sulfur dioxide; CH4, methane.
Additional pollutants were added into the pollutant models for multiple analysis only when Pearson’s correlation coefficient was <0.3.
Cox regression models were adjusted for age, urbanization level, insurance amount, CCI score, Inflammatory disease of the ovary, fallopian tube, pelvic cellular tissue, and peritoneum, Inflammatory disease of the uterus, Endometriosis, Hypertension, Diabetes mellitus, Hypertriglyceridemia, Hypercholesterolemia, Coronary artery disease, ambient temperature, lag0-2, season, and controlled pollutants (weak correlation with O3).
